# Supplementary material for: Health assets in older age: a systematic review
Source: PubMed Central journal article supplement — BMJ Open. 2017 May 17;7(5):e013226. doi: 10.1136/bmjopen-2016-013226 (PMC5777471; doi:10.1136/bmjopen-2016-013226), 2017-05-17
Supplement: bmjopen-2016-013226supp001.pdf [file bmjopen-2016-013226supp001.pdf]

### S1: Criteria and scoring for quality assessment

| Criterion                         | Assessment item description                                                                                        | Number of studies scoring minimum of 1 on assessment item |
|-----------------------------------|--------------------------------------------------------------------------------------------------------------------|-----------------------------------------------------------|
| <b>METHODS</b>                    | 1. Is the hypothesis/aim/objective of study clearly defined?                                                       | 23                                                        |
|                                   | 2. Are all the exposure variables clearly described?                                                               | 22                                                        |
|                                   | 3. Are the main outcomes clearly described?                                                                        | 23                                                        |
|                                   | 4. Is the study design clearly described?                                                                          | 22                                                        |
|                                   | 5. Is the source of the subject population (including sampling frame) clearly described?                           | 20                                                        |
|                                   | 6. Are the eligibility criteria for subject selection clearly described?                                           | 21                                                        |
| <b>POPULATION BACKGROUND</b>      | 7. Are the participation rates reported? Are ascertainment of record availability described?                       | 9                                                         |
|                                   | 8. Are the characteristics of study participants described?                                                        | 23                                                        |
|                                   | 9. Have characteristics of subjects lost after entry or not participating from eligible population been described? | 13                                                        |
| <b>ANALYSIS</b>                   | 10. Is there adequate adjustment for covariates and confounders in analysis?                                       | 18                                                        |
|                                   | 11. Are important covariates and confounders described?                                                            | 19                                                        |
|                                   | 12. Are statistical methods clearly described?                                                                     | 23                                                        |
| <b>RELIABILITY &amp; VALIDITY</b> | 13. Are the exposure variables reliable?                                                                           | 9                                                         |
|                                   | 14. Are the exposure variables valid?                                                                              | 8                                                         |
|                                   | 15. Are outcome measures reliable?                                                                                 | 19                                                        |
|                                   | 16. Are outcome measures valid?                                                                                    | 19                                                        |
| <b>RESULTS</b>                    | 17. Are main findings clearly described?                                                                           | 23                                                        |
|                                   | 18. Does the study provide estimates of random variability for outcomes or exposures (CI, SD)?                     | 19                                                        |
|                                   | 19. Does the study provide estimates of statistical parameters (regression coefficients, odds ratios)?             | 20                                                        |
|                                   | 20. Can study results be applied to the eligible population?                                                       | 18                                                        |
